# Supplementary material
Source: publisher figshare collection journal article supplement (https://frontiersin.figshare.com/ndownloader/files/24088841)
Supplement: Supplementary file 1 [file 24088841]

## Sheet: Sheet1
id	mutant-FPKM1	mutant-FPKM2	wild type-FPKM1	wild type-FPKM2	up-down-regulations(mutant/wild type)
comp10007_c0_seq1	88.44	106.91	0.2	0.24	Up
comp10047_c0_seq2	40.07	41.56	0.16	0.14	Up
comp10090_c0_seq2	18.81	31.04	0.2	0.18	Up
comp10242_c0_seq1	104.84	110.77	0.38	0.42	Up
comp10313_c0_seq2	10.84	9.65	0.14	0.1	Up
comp10314_c0_seq1	55.12	43.9	0.45	0.4	Up
comp10389_c0_seq2	16.03	18.64	0.09	0.12	Up
comp10421_c0_seq1	34.17	33.81	0.38	0.4	Up
comp10424_c0_seq1	124.42	183.75	0.21	0.28	Up
comp10435_c0_seq1	62.06	50.93	0.47	0.49	Up
comp10517_c0_seq1	130.77	141.31	1.66	2.2	Up
comp10572_c0_seq2	1.75	1.46	47.75	53.1	Down
comp10577_c0_seq1	28.09	26.11	0.24	0.09	Up
comp10583_c0_seq1	20.41	29.92	0.38	0.34	Up
comp10699_c0_seq1	45.63	46.51	0.18	0.14	Up
comp10729_c0_seq1	29.3	28.34	0.26	0.26	Up
comp10771_c0_seq2	29.84	26.77	0.15	0.13	Up
comp10790_c0_seq1	13.85	20.2	0.11	0.14	Up
comp10848_c0_seq1	8.26	9.53	0.07	0.08	Up
comp10867_c0_seq1	15.38	19.83	0.16	0.19	Up
comp10875_c0_seq1	12.04	12.06	0.16	0.14	Up
comp10905_c0_seq1	3.9	5.2	82.72	72.17	Down
comp10934_c0_seq1	13.37	17.89	0.2	0.16	Up
comp11000_c0_seq2	37.21	34	0.1	0.08	Up
comp11006_c0_seq1	83.26	79.18	0.05	0.06	Up
comp11093_c0_seq1	55.01	51.69	0.7	0.5	Up
comp11130_c0_seq1	8.81	9.19	124.79	112.18	Down
comp11215_c0_seq2	17.4	14.22	0.2	0.17	Up
comp11234_c0_seq1	2.6	2.77	75.61	97.64	Down
comp11246_c0_seq1	16.32	17.05	0.12	0.19	Up
comp11300_c0_seq1	29.44	26.55	0.54	0.61	Up
comp11338_c0_seq1	24.93	27.46	0.26	0.22	Up
comp11389_c0_seq1	33.28	38.66	0.39	0.42	Up
comp11439_c0_seq1	264.26	329.74	0.43	0.43	Up
comp11445_c0_seq1	36.8	40.45	0.35	0.42	Up
comp11454_c0_seq2	162.51	127.98	0.29	0.18	Up
comp11504_c0_seq1	19.29	17.43	0.27	0.12	Up
comp11573_c0_seq2	67.26	54.16	0.1	0.13	Up
comp11591_c0_seq1	42.48	40.14	0.22	0.37	Up
comp11651_c0_seq1	47.64	42.01	0.35	0.27	Up
comp11666_c0_seq1	13.81	12.17	0.08	0.09	Up
comp11674_c0_seq1	31.48	35.37	0.1	0.09	Up
comp11724_c0_seq1	9.69	11.84	0.23	0.2	Up
comp11726_c0_seq1	35.5	33.46	0.23	0.25	Up
comp11728_c0_seq2	44.75	34.2	0.57	0.59	Up
comp11792_c0_seq1	100	91.98	0.33	0.36	Up
comp11845_c0_seq1	40.82	48.47	0.35	0.35	Up
comp11881_c0_seq2	59.41	41.9	0.37	0.53	Up
comp11927_c0_seq2	75.02	66.18	0.54	0.45	Up
comp11974_c0_seq1	4.95	4.67	0.36	0.26	Up
comp12004_c0_seq1	24.31	20.27	0.15	0.13	Up
comp12204_c0_seq2	10.39	9.56	150.14	141.97	Down
comp1221_c0_seq1	18.73	20.57	0.21	0.15	Up
comp12220_c0_seq2	20.32	23.75	0.42	0.46	Up
comp12250_c0_seq2	28.04	26.58	0.37	0.34	Up
comp12320_c0_seq2	120.75	132.97	0.12	0.09	Up
comp12324_c0_seq1	19.7	22.59	0.09	0.15	Up
comp12404_c0_seq1	93.13	96.49	0.25	0.23	Up
comp12500_c0_seq2	54.72	52.32	0.06	0.05	Up
comp12579_c0_seq1	33.48	38.22	0.05	0.04	Up
comp12608_c0_seq1	730.93	607	1.03	1.47	Up
comp12629_c0_seq1	413.43	343.77	1.37	1.16	Up
comp12667_c0_seq3	11.53	11.95	0.19	0.13	Up
comp12669_c0_seq3	11.8	11.5	0.16	0.13	Up
comp12675_c0_seq3	39.56	29.31	0.18	0.22	Up
comp12702_c0_seq2	11.59	12.83	0.13	0.14	Up
comp12715_c0_seq1	41.57	46.11	0.17	0.19	Up
comp12726_c0_seq4	32.94	33.14	0.47	0.46	Up
comp12735_c0_seq2	115.08	87.94	0.39	0.4	Up
comp12849_c0_seq1	39.68	36.56	0.14	0.15	Up
comp12858_c0_seq3	128.99	185.86	0.34	0.34	Up
comp12884_c0_seq1	51.39	69.66	0.19	0.19	Up
comp12891_c0_seq1	28.5	34.15	0.12	0.09	Up
comp12939_c0_seq1	15.39	11.72	0.2	0.25	Up
comp12975_c0_seq1	28.23	27.52	0.83	0.68	Up
comp12981_c0_seq1	32.07	40.43	0.12	0.13	Up
comp13037_c0_seq1	12.87	13.48	0.17	0.13	Up
comp13041_c0_seq2	8.65	8.57	0.08	0.09	Up
comp13068_c0_seq1	37.29	34.08	0.3	0.29	Up
comp13080_c0_seq1	23.31	18.98	0.5	0.69	Up
comp13109_c0_seq1	18.12	15.44	0.12	0.09	Up
comp13113_c0_seq1	43.27	46.67	0.12	0.16	Up
comp13142_c0_seq1	7.87	7.24	76.87	102.71	Down
comp13167_c0_seq2	18.16	15.17	0.2	0.14	Up
comp13214_c0_seq1	13.02	10.97	0.28	0.25	Up
comp13237_c0_seq1	10.14	9.17	0.12	0.05	Up
comp13248_c0_seq2	9.14	9.37	0.09	0.07	Up
comp13253_c0_seq2	86.43	72.06	0.14	0.18	Up
comp13281_c0_seq2	18.82	20.18	0.18	0.29	Up
comp13293_c0_seq1	18.49	18.02	0.34	0.37	Up
comp13295_c0_seq1	18.75	20.58	0.13	0.19	Up
comp13340_c0_seq1	15.04	13.22	0.16	0.17	Up
comp13419_c0_seq2	58	56.54	0.92	0.61	Up
comp13508_c0_seq1	588.7	485	1.25	0.88	Up
comp13551_c0_seq1	48.18	42.47	0.11	0.09	Up
comp13568_c0_seq2	75.25	94.77	0.24	0.23	Up
comp13605_c0_seq3	63.17	63.92	0.63	0.39	Up
comp13627_c0_seq1	13	16.96	0.55	0.64	Up
comp13660_c0_seq4	41.19	42.42	0.14	0.17	Up
comp13691_c0_seq2	12.58	14.48	0.38	0.33	Up
comp13742_c0_seq1	75.99	68.93	0.46	0.46	Up
comp13757_c0_seq1	788.28	703.44	2.59	2.74	Up
comp13775_c0_seq1	22.79	13.33	0.17	0.18	Up
comp13776_c0_seq1	38.63	33.48	0.17	0.18	Up
comp13782_c0_seq2	23.66	25.07	0.36	0.24	Up
comp13848_c0_seq1	12.87	14.06	0.28	0.31	Up
comp13852_c0_seq1	626.59	607.87	0.38	0.39	Up
comp13885_c0_seq1	27.46	26.75	0.23	0.24	Up
comp13970_c0_seq1	9.82	11.9	0.11	0.1	Up
comp13990_c0_seq4	119.66	137.24	0.31	0	Up
comp14072_c0_seq3	25.76	31.75	0.44	0.41	Up
comp14086_c0_seq3	36.65	57.93	0.41	0.31	Up
comp14106_c0_seq1	23.39	25.54	0.28	0.3	Up
comp14120_c0_seq1	11.72	13.72	0.12	0.11	Up
comp14160_c0_seq2	14.62	17.24	0.33	0.35	Up
comp14187_c0_seq2	16.76	14.22	0.21	0.09	Up
comp14235_c0_seq3	32.22	29.7	0.12	0.1	Up
comp14239_c0_seq1	25.15	32.74	0.37	0.34	Up
comp14254_c0_seq1	4.45	3.92	222.25	257.2	Down
comp14255_c0_seq4	47.77	50.48	0.28	0.28	Up
comp14258_c0_seq2	21.12	18.77	0.23	0.17	Up
comp14306_c0_seq3	15.54	19.95	0.53	0.48	Up
comp14320_c0_seq2	19.94	15.97	0.19	0.19	Up
comp14333_c0_seq1	13.16	13.14	0.11	0.1	Up
comp14379_c0_seq1	45.7	46.16	0.79	0.76	Up
comp14499_c0_seq2	9.09	7.41	0.16	0.14	Up
comp14524_c0_seq2	26.47	34.6	0.18	0.12	Up
comp14567_c0_seq1	29.1	22.5	0.25	0.21	Up
comp14636_c0_seq4	22.07	22.37	0.27	0.2	Up
comp14650_c0_seq2	323.67	287.83	0.14	0.15	Up
comp14694_c0_seq1	29.68	25.99	0.8	0.7	Up
comp14733_c0_seq3	99.26	86.73	0.54	0.62	Up
comp14759_c0_seq1	12.22	7.28	0.13	0.08	Up
comp14775_c0_seq4	19.35	19.45	0.45	0.04	Up
comp14810_c0_seq1	41.59	42.41	0.26	0.13	Up
comp14846_c0_seq1	145.62	124.33	0.19	0.21	Up
comp14853_c0_seq1	358.85	351.48	2.59	3.61	Up
comp14858_c0_seq1	39.19	33.51	0.49	0.35	Up
comp14892_c0_seq1	55.89	82.11	9.83	9.84	Up
comp14917_c1_seq1	24.32	19.24	0.22	0.38	Up
comp14922_c0_seq1	23.66	17.53	0.61	0.56	Up
comp14941_c0_seq1	59.63	73.81	0.72	0.43	Up
comp14947_c0_seq1	24.58	28.78	0.29	0.15	Up
comp14960_c0_seq2	32.09	23.39	0.14	0.16	Up
comp14995_c0_seq3	13.48	15.57	0.06	0.06	Up
comp15043_c0_seq2	122.74	137.83	0.17	0.18	Up
comp15053_c0_seq2	16.39	15.66	0.15	0.13	Up
comp15070_c0_seq2	677.73	576.36	0.56	0.44	Up
comp15104_c0_seq1	29.91	28.02	0.35	0.27	Up
comp15107_c0_seq1	17.18	16.72	0.04	0.06	Up
comp15169_c0_seq1	60.62	51.05	0.14	0.11	Up
comp15178_c0_seq1	12.51	12.55	0.17	0.14	Up
comp15228_c0_seq2	26.58	26.45	0.44	0.27	Up
comp15239_c0_seq2	11.12	10.65	0.13	0.11	Up
comp15241_c0_seq4	112.57	113	0.31	0.41	Up
comp15313_c0_seq4	20.36	17.53	0.23	0.22	Up
comp15358_c0_seq3	585.64	560.6	0.77	0.66	Up
comp15371_c0_seq2	18.67	17.16	0.36	0.34	Up
comp15375_c0_seq1	13.47	16.54	0.23	0.27	Up
comp15444_c0_seq1	21.18	15.63	0.15	0.18	Up
comp15449_c0_seq1	23.3	33.58	0.19	0.09	Up
comp15475_c0_seq1	10.83	10.44	0.07	0.04	Up
comp15482_c0_seq2	21.35	20.05	0.17	0.16	Up
comp15586_c0_seq2	17.51	19.69	0.82	0.93	Up
comp15657_c0_seq1	58.39	56.12	0.26	0.26	Up
comp15694_c0_seq2	20.32	21.08	0.48	0.2	Up
comp15706_c0_seq2	31.58	23.46	0.13	0.11	Up
comp15805_c0_seq2	12.07	10.65	0.1	0.09	Up
comp1584_c0_seq2	13.61	12.76	0.22	0.22	Up
comp15893_c0_seq2	99.2	88.09	0.29	0.4	Up
comp15901_c0_seq2	13.64	17.73	0.28	0.28	Up
comp15933_c0_seq1	14.57	11.98	0.16	0.12	Up
comp15948_c0_seq1	70.76	55.96	0.18	0.19	Up
comp16034_c0_seq1	26.43	23.67	0.25	0.15	Up
comp16043_c0_seq2	35.64	31.86	0.07	0.07	Up
comp16067_c0_seq3	52.71	102.58	0.15	0.12	Up
comp16085_c0_seq1	801.4	897.58	2.11	2.06	Up
comp16189_c0_seq1	25.61	21.78	0.21	0.15	Up
comp16312_c0_seq1	52.79	49.67	0.13	0.13	Up
comp16483_c0_seq2	53.69	54.44	0.08	0.07	Up
comp16508_c0_seq2	24.24	14.9	0.24	0.22	Up
comp16793_c0_seq6	9.41	8.39	0.07	0.07	Up
comp1681_c0_seq1	13.54	12.61	0.16	0.14	Up
comp16847_c0_seq2	11.71	13.1	0.15	0.12	Up
comp16913_c0_seq3	30.73	31.1	0.2	0.08	Up
comp16933_c0_seq3	81.72	85.95	0.65	0.57	Up
comp17116_c0_seq1	61.8	50.9	0.21	0.23	Up
comp17132_c0_seq1	72.58	67.57	0.16	0.17	Up
comp17256_c0_seq3	36.05	33.57	0.39	0.3	Up
comp17389_c0_seq4	10.27	8.53	0.1	0.08	Up
comp17458_c0_seq1	35.36	50.54	0.19	0.25	Up
comp17534_c0_seq3	49.29	48.36	0.68	0.73	Up
comp17659_c0_seq1	22.6	25.29	0.21	0.16	Up
comp17687_c0_seq2	13.92	19.04	0.12	0.12	Up
comp17763_c1_seq2	13.15	13.68	0.16	0.12	Up
comp18013_c0_seq1	55.75	39.44	0.19	0.16	Up
comp1839_c0_seq2	11.26	12	0.1	0.07	Up
comp18409_c0_seq3	1.6	1.48	60.87	59.07	Down
comp18559_c0_seq3	18.14	24.4	0.22	0.17	Up
comp18690_c0_seq3	25.35	25.22	0.38	0.25	Up
comp18729_c0_seq1	40.02	45.03	0.24	0.17	Up
comp18763_c0_seq1	21.55	23.87	0.09	0.09	Up
comp18815_c0_seq1	13.56	14.02	0.1	0.1	Up
comp18883_c0_seq1	28.68	24.05	0.2	0.15	Up
comp18970_c0_seq1	7.84	8.18	0.13	0.17	Up
comp19082_c0_seq1	122.58	149.71	0.18	0.13	Up
comp19120_c1_seq1	21.07	21.4	0.34	0.2	Up
comp19127_c0_seq2	21.96	25.82	0.29	0.32	Up
comp19138_c0_seq2	39.14	40.83	0.21	0.12	Up
comp19180_c0_seq2	14	14.77	0.21	0.19	Up
comp19248_c0_seq1	16.97	17.41	0.34	0.3	Up
comp19665_c0_seq2	29.78	28.18	0.27	0.21	Up
comp19793_c0_seq2	16.22	15.79	0.13	0.16	Up
comp19851_c0_seq2	72.9	88.8	0.45	0.39	Up
comp19880_c0_seq1	9.79	11.32	0.17	0.1	Up
comp19938_c1_seq1	37.63	35.55	0.2	0.13	Up
comp19984_c0_seq1	36.76	41.18	0.12	0.09	Up
comp19985_c0_seq1	15.46	18.11	0.17	0.12	Up
comp20008_c0_seq1	8.2	9.54	0.06	0.11	Up
comp20039_c0_seq5	30.08	32.55	0.11	0.09	Up
comp20072_c1_seq1	16.18	20.78	0.24	0.25	Up
comp20084_c0_seq4	37.76	37.96	0.23	0.24	Up
comp20137_c0_seq2	7.45	10.46	0.14	0.1	Up
comp20146_c0_seq2	20.94	21.38	0.1	0.05	Up
comp20151_c0_seq4	16.55	13.2	0.1	0.18	Up
comp20359_c0_seq3	9.02	7.59	0.07	0.06	Up
comp20376_c0_seq4	7.69	7.84	0.04	0.06	Up
comp20418_c0_seq1	11.87	14.23	0.12	0.16	Up
comp20419_c0_seq4	9.41	11.53	0.14	0.1	Up
comp20456_c0_seq1	24.45	22.47	0.14	0.13	Up
comp20630_c0_seq4	28.52	27.22	0.06	0.06	Up
comp20660_c1_seq2	219.6	84.64	29.24	30.26	Up
comp20668_c0_seq2	15.31	15.54	0.07	0.08	Up
comp20725_c1_seq1	42.18	38.56	0.27	0.22	Up
comp20727_c0_seq1	16.55	27.52	0.19	0.16	Up
comp2073_c0_seq2	22.61	20.2	0.23	0.14	Up
comp20778_c0_seq2	18.2	15.5	0.19	0.25	Up
comp20790_c0_seq2	20.7	27.05	0.28	0.17	Up
comp20795_c0_seq1	21.66	21.61	0.44	0.42	Up
comp20817_c0_seq1	15.81	13.53	0.2	0.16	Up
comp20884_c0_seq4	35.26	30.3	0.34	0.28	Up
comp20903_c0_seq3	20.73	21.17	0.11	0.11	Up
comp20914_c0_seq1	16.49	14.99	0.13	0.2	Up
comp20916_c0_seq2	199.89	211.39	0.65	0.73	Up
comp20944_c0_seq4	20.88	23.39	0.12	0.16	Up
comp20966_c0_seq4	20.25	21.28	0.13	0.13	Up
comp20991_c0_seq1	38.46	51.43	0.07	0.07	Up
comp21009_c0_seq3	18.39	17.74	0.16	0.16	Up
comp21174_c0_seq1	32.49	30.82	0.23	0.24	Up
comp21300_c0_seq2	17.59	18.25	0.13	0.12	Up
comp21302_c0_seq1	30.58	27.05	0.29	0.23	Up
comp21319_c0_seq2	10.38	12.1	0.12	0.1	Up
comp21320_c0_seq3	11.17	13.96	0.15	0.15	Up
comp21329_c0_seq3	18.73	21.48	0.2	0.25	Up
comp21330_c0_seq2	12.09	14.39	0.1	0.12	Up
comp2139_c0_seq2	32.07	27.55	0.5	0.55	Up
comp21390_c0_seq2	26.64	22.94	0.13	0.14	Up
comp21393_c0_seq4	8.98	8.14	0.1	0.09	Up
comp21433_c0_seq2	15.35	11.55	0.42	0.5	Up
comp21440_c0_seq1	11.79	12.48	0.3	0.29	Up
comp21477_c0_seq3	17.07	18.12	0.21	0.14	Up
comp21485_c0_seq2	27.51	25.62	0.11	0.1	Up
comp21573_c0_seq1	165.76	175.36	20.81	16.99	Up
comp21665_c0_seq3	16.12	15.33	0.13	0.14	Up
comp21713_c0_seq5	61.64	51.92	0.04	0.42	Up
comp21807_c0_seq4	64.9	65.48	0.18	0.19	Up
comp21835_c0_seq1	40.04	37.84	0.24	0.19	Up
comp21851_c0_seq1	20.91	18.49	0.24	0.16	Up
comp21895_c0_seq3	39.18	35.51	0.22	0.17	Up
comp2194_c0_seq2	17.46	19.36	0.21	0.29	Up
comp21952_c0_seq4	11.88	15.86	0.11	0.1	Up
comp22028_c0_seq1	17.4	13.03	0.14	0.16	Up
comp22044_c0_seq1	33.71	31.49	0.19	0.17	Up
comp22236_c0_seq5	22.42	12.55	0.15	0.12	Up
comp22324_c0_seq1	25.34	21.62	0.29	0.33	Up
comp22355_c0_seq4	59.66	55.84	0.25	0.59	Up
comp22414_c0_seq2	84.95	79.83	0.15	0.2	Up
comp22452_c0_seq6	15.72	14.79	0.07	0.06	Up
comp22475_c0_seq2	21.29	20.32	0.14	0.1	Up
comp22497_c0_seq1	30.8	24.96	0.15	0.19	Up
comp22594_c0_seq1	12.78	11.2	325.08	334.23	Down
comp22691_c1_seq1	90.92	100.01	0.1	0.13	Up
comp22830_c0_seq2	23.76	21.01	0.16	0.24	Up
comp22888_c0_seq6	20.52	19.96	0.29	0.35	Up
comp22921_c0_seq4	66.19	57.21	0.1	0.09	Up
comp22939_c1_seq2	22.46	36.41	0.33	0.27	Up
comp22966_c0_seq1	149.2	166.8	0.84	0.94	Up
comp23021_c0_seq3	16.41	14.58	0.1	0.26	Up
comp23058_c0_seq3	5.06	4.66	0.15	0.11	Up
comp23129_c0_seq1	53	53.54	1.18	1.06	Up
comp23172_c0_seq1	105.31	82.7	1.06	0.7	Up
comp23187_c0_seq7	123.57	56.51	0.07	0.08	Up
comp23194_c0_seq3	37.78	22.38	0.33	0.28	Up
comp23279_c0_seq10	61.21	62.74	0.3	0.29	Up
comp23281_c0_seq3	60.75	69.97	0.12	0.11	Up
comp23325_c1_seq2	66.25	77.15	0.46	0.47	Up
comp23332_c0_seq1	68.02	73.54	0.2	0.16	Up
comp23360_c0_seq2	37.37	42.65	0.15	0.16	Up
comp23402_c0_seq4	0.86	0.42	147.6	170.49	Down
comp23420_c0_seq1	8.84	7.04	0.05	0.07	Up
comp23446_c0_seq4	13.02	14.21	0.1	0.11	Up
comp23512_c0_seq2	33.53	43.9	0.13	0.12	Up
comp23523_c0_seq2	16.76	13.29	0.1	0.1	Up
comp23560_c0_seq3	33.27	34.52	0.23	0.17	Up
comp23565_c0_seq2	30.21	28.94	0.28	0.44	Up
comp23596_c0_seq4	21.11	17.64	0.09	0.08	Up
comp23649_c0_seq3	26.63	26.09	2.02	2.97	Up
comp23824_c0_seq1	64.46	44.4	4.95	5.07	Up
comp23853_c0_seq1	265.39	240.13	0.49	0.44	Up
comp23895_c0_seq1	16.21	15.07	0.04	0.06	Up
comp23909_c0_seq5	69.87	64.51	1.25	0.5	Up
comp23994_c0_seq5	36.32	33.43	0.16	0.16	Up
comp24020_c0_seq2	33.09	25.53	0.13	0.11	Up
comp24066_c0_seq1	21.89	19.84	0.12	0.14	Up
comp24070_c0_seq4	114.18	145.47	0.07	0.11	Up
comp24097_c0_seq7	17.06	16.24	0.09	0.06	Up
comp24113_c0_seq1	16.34	17.25	0.2	0.21	Up
comp24141_c0_seq2	25.21	31.72	0.3	0.33	Up
comp24169_c1_seq1	15.17	13.27	0.07	0.06	Up
comp24189_c0_seq3	17.42	17	0.2	0.19	Up
comp24219_c0_seq4	43.09	40.61	0.11	0.11	Up
comp24267_c0_seq4	13.42	12.82	0.17	0.14	Up
comp24297_c0_seq1	37.2	40.93	0.23	0.16	Up
comp24349_c0_seq1	28.01	29.21	0.15	0.14	Up
comp24357_c0_seq1	233.33	245.04	0.07	0.05	Up
comp24371_c0_seq7	80.03	117.33	0.1	0.11	Up
comp24415_c0_seq8	13.53	11.89	0.33	0.31	Up
comp24478_c0_seq1	22.4	21.69	0.18	0.15	Up
comp24627_c0_seq2	13.28	12.65	0.07	0.1	Up
comp24637_c0_seq1	60.84	57.93	0.16	0.11	Up
comp24642_c0_seq16	6.01	6.58	185.77	181.36	Down
comp2468_c0_seq2	21.64	24.1	0.11	0.11	Up
comp24735_c0_seq6	37.71	32.29	0.13	0.13	Up
comp24764_c0_seq1	2.66	3.32	126.44	115.82	Down
comp24782_c0_seq2	8.16	11.33	0.11	0.1	Up
comp2481_c0_seq2	22.29	32.37	0.62	0.57	Up
comp24883_c0_seq4	25.52	21.37	0.17	0.14	Up
comp24946_c0_seq3	11.55	11.33	0.2	0.21	Up
comp24947_c0_seq4	12.43	11.01	0.18	0.16	Up
comp25021_c0_seq5	52.02	49.69	0.21	0.15	Up
comp2503_c0_seq1	16.03	12.56	0.19	0.12	Up
comp25033_c0_seq7	54.54	53.95	0.07	0.08	Up
comp25101_c0_seq2	64.21	57.91	0.14	0.1	Up
comp25102_c1_seq1	87.4	108.8	0.16	0.28	Up
comp25106_c0_seq4	273.06	289.18	0.72	0.71	Up
comp25130_c0_seq2	39.25	38.08	0.52	0.99	Up
comp25132_c0_seq2	18.89	18.15	0.17	0.1	Up
comp25150_c1_seq1	14.96	17.07	0.15	0.13	Up
comp25165_c0_seq5	19.61	16.29	0.24	0.22	Up
comp25191_c0_seq7	10.84	11.55	0.15	0.16	Up
comp25260_c0_seq2	676.73	635.33	2.98	3.75	Up
comp25296_c1_seq3	18.82	19.19	0.14	0.18	Up
comp25298_c1_seq3	14.2	13.52	0.12	0.14	Up
comp25323_c0_seq3	52.81	52.77	0.44	0.28	Up
comp2538_c0_seq1	21.89	24.16	0.22	0.25	Up
comp2549_c0_seq2	20.07	17.29	0.14	0.12	Up
comp25526_c0_seq2	24.35	21.1	0.69	1.15	Up
comp25594_c0_seq3	10.85	11.9	0.21	0.19	Up
comp25699_c0_seq3	34.09	29.84	0.3	0.13	Up
comp25719_c0_seq10	24.34	20.15	0.18	0.14	Up
comp25812_c1_seq3	22.77	25.21	0.09	0.08	Up
comp25921_c0_seq1	14.95	12.7	0.11	0.14	Up
comp26002_c0_seq12	13.27	17.1	0.15	0.09	Up
comp26038_c0_seq7	13.72	10.66	0.11	0.12	Up
comp26052_c0_seq2	15.17	14.14	0.2	0.2	Up
comp26056_c0_seq1	16.15	16.55	0.11	0.08	Up
comp26058_c0_seq4	19.5	20.77	0.25	0.19	Up
comp26095_c0_seq4	15.16	13.87	0.17	0.11	Up
comp26098_c0_seq1	49.55	78.19	0.53	0.49	Up
comp26161_c0_seq2	23.15	21.95	0.05	0.06	Up
comp26183_c0_seq3	40.19	38.82	0.2	0.16	Up
comp26244_c0_seq5	18.61	15.42	0.3	0.32	Up
comp26303_c0_seq7	16.32	13.83	0.11	0.11	Up
comp26350_c0_seq3	89.03	61.74	0.11	0.1	Up
comp26362_c0_seq5	17.96	22.71	0.19	0.15	Up
comp26437_c0_seq1	10.97	11.01	0.21	0.23	Up
comp26559_c0_seq1	12.32	11.55	0.08	0.03	Up
comp26573_c0_seq2	18.18	19.19	0.15	0.13	Up
comp26578_c0_seq4	17.36	15.75	0.13	0.15	Up
comp26607_c0_seq4	29.93	27.75	0.09	0.11	Up
comp26620_c0_seq2	13.09	11.06	0.23	0.25	Up
comp26651_c0_seq2	19.72	18.53	0.2	0.22	Up
comp26721_c1_seq5	80.02	68.87	0.3	0.19	Up
comp26730_c0_seq8	15.37	17.1	0.25	0.33	Up
comp26746_c0_seq2	22.45	16.12	0.22	0.21	Up
comp26760_c0_seq11	14.15	13.3	0.12	0.14	Up
comp26776_c0_seq5	16.55	14.75	0.15	0.12	Up
comp26777_c0_seq2	39.1	38.91	0.19	0.15	Up
comp26877_c0_seq11	18.17	15.2	0.09	0.1	Up
comp26882_c0_seq4	14.74	15.16	0.11	0.1	Up
comp26904_c0_seq2	97.19	69.07	0.44	0.37	Up
comp26908_c0_seq7	83.09	86.92	0.13	0.22	Up
comp26929_c0_seq5	74.48	64.73	0.12	0.11	Up
comp26943_c0_seq5	21.46	20.55	0.07	0.06	Up
comp26976_c0_seq7	49.54	37.63	0.07	0.08	Up
comp26988_c0_seq1	27.56	28.74	0.17	0.08	Up
comp26991_c0_seq6	18.81	19.19	0.07	0.06	Up
comp27014_c0_seq5	20.29	18.45	0.47	0.48	Up
comp27022_c0_seq5	17.04	24.3	0.24	0.18	Up
comp27030_c1_seq1	14.61	20.47	0.21	0.18	Up
comp27051_c0_seq4	62.29	93.93	0.49	0.69	Up
comp27055_c0_seq1	62.13	71.01	0.11	0.11	Up
comp27068_c0_seq17	68.51	75.16	0.16	0.15	Up
comp27075_c0_seq1	36.28	31.16	0.19	0.19	Up
comp27076_c0_seq1	27.04	26.64	1.02	0.93	Up
comp27089_c0_seq1	23.35	28.47	0.19	0.24	Up
comp27096_c0_seq11	19.2	15.28	0.11	0.09	Up
comp27112_c0_seq5	13.88	16.25	0.2	0.25	Up
comp27135_c0_seq2	487.24	444.71	0.4	0.38	Up
comp27138_c0_seq5	23.3	23.02	0.13	0.11	Up
comp27161_c0_seq1	41.96	37.36	0.66	0.01	Up
comp27176_c0_seq4	37.7	31.93	0.1	0.08	Up
comp27188_c0_seq7	16.14	11.45	0.06	0.06	Up
comp27196_c0_seq2	16.88	19.01	0.46	0.47	Up
comp27204_c0_seq9	20.61	14.58	0.17	0.16	Up
comp27220_c0_seq2	15.25	12.83	0.18	0.17	Up
comp27227_c0_seq5	11.4	12.38	0.4	0.31	Up
comp27309_c0_seq1	9.88	12.02	0.09	0.1	Up
comp27387_c0_seq2	10.95	11.84	0.12	0.08	Up
comp27446_c0_seq4	17.63	16.66	0.23	0.2	Up
comp27502_c0_seq2	15.89	14.62	0.28	0.06	Up
comp27612_c0_seq2	16.19	17.18	0.09	0.13	Up
comp27615_c0_seq2	17.53	16.22	0.23	0.17	Up
comp27661_c0_seq1	13.32	12.75	0.12	0.13	Up
comp27675_c0_seq4	13.98	13.65	0.12	0.1	Up
comp27753_c0_seq2	9.1	6.27	0.05	0.06	Up
comp27980_c0_seq1	16.38	14.24	0.2	0.17	Up
comp28086_c0_seq3	15.65	15.33	0.13	0.12	Up
comp28214_c0_seq4	24.57	26.85	0.34	0.27	Up
comp28225_c0_seq5	17.42	18.08	0.14	0.16	Up
comp28240_c1_seq6	12.35	16.01	0.48	0.45	Up
comp28244_c0_seq2	5.58	6.3	0.05	0.07	Up
comp28258_c0_seq1	2.4	1.95	0.19	0.23	Up
comp28347_c0_seq4	26.79	26.26	0.53	0.5	Up
comp28421_c0_seq5	63.97	55.07	0.14	0.13	Up
comp28432_c0_seq1	10.25	12.21	0.12	0.11	Up
comp28462_c0_seq4	13.58	12.36	0.27	0.23	Up
comp28518_c0_seq4	22.25	18.3	0.06	0.06	Up
comp28537_c0_seq14	20.67	22.54	0.07	0.08	Up
comp28538_c0_seq4	12.09	10.65	0.07	0.12	Up
comp28542_c0_seq5	19.29	18.59	0.35	0.44	Up
comp28591_c0_seq1	84.8	78.38	0.17	0.14	Up
comp28597_c0_seq2	23.61	20.7	0.11	0.1	Up
comp28630_c0_seq1	15.23	10.12	0.13	0.11	Up
comp28631_c0_seq2	26.43	23.72	0.09	0.09	Up
comp28830_c0_seq2	17.86	22.05	0.37	0.21	Up
comp28855_c0_seq1	172.09	191.53	7.61	9.1	Up
comp28862_c0_seq2	19.05	24.47	0.26	0.29	Up
comp28959_c0_seq3	26.1	27.69	0.23	0.21	Up
comp29114_c0_seq5	12.03	7.03	0.1	0.09	Up
comp29231_c0_seq5	13.81	11.94	0.14	0.11	Up
comp29279_c0_seq3	11.9	13.07	0.18	0.06	Up
comp29289_c0_seq25	34.59	30.93	0.07	0.07	Up
comp2933_c0_seq1	11.82	11.51	0.14	0.11	Up
comp29342_c0_seq3	15.82	14.73	0.15	0.27	Up
comp29360_c0_seq1	10.56	10.03	0.07	0.11	Up
comp29537_c0_seq1	19.36	21.21	0.16	0.2	Up
comp29635_c0_seq2	16.35	13.89	0.2	0.14	Up
comp29647_c0_seq4	16.93	18.84	0.11	0.13	Up
comp29648_c0_seq5	11.55	10.15	0.1	0.12	Up
comp29676_c0_seq3	12.72	14.43	0.1	0.13	Up
comp29682_c0_seq10	12.44	16.68	0.18	0.32	Up
comp29692_c0_seq2	17.06	15.35	0.18	0.12	Up
comp29706_c0_seq1	13.23	15.1	0.14	0.18	Up
comp29716_c1_seq6	45.91	42.23	0.23	0.23	Up
comp29759_c0_seq4	15.61	18.8	0.11	0.1	Up
comp29763_c1_seq2	51.37	52.39	5.94	6.33	Up
comp29773_c0_seq1	18.79	21.59	0.12	0.11	Up
comp29777_c1_seq11	36.03	23.88	1.54	1.51	Up
comp29797_c0_seq2	17.33	7.15	0.1	0.1	Up
comp29809_c0_seq1	17.46	16.84	0.28	0.25	Up
comp29821_c0_seq7	14.24	14.82	0.12	0.24	Up
comp29870_c0_seq1	9.57	9.13	0.12	0.1	Up
comp29899_c0_seq13	15.02	12.41	0.11	0.1	Up
comp29919_c1_seq21	9.71	10.49	0.11	0.05	Up
comp29925_c0_seq10	10.62	10.85	0.07	0.16	Up
comp29927_c0_seq6	16.51	15.8	0.13	0.12	Up
comp29929_c0_seq6	26.76	26.75	0.31	0.35	Up
comp29946_c0_seq6	30.84	27.48	0.11	0.11	Up
comp29956_c0_seq7	14.46	15.73	0.11	0.12	Up
comp29974_c0_seq5	7.24	14.62	0.09	0.11	Up
comp29983_c0_seq3	25.43	24.06	0.12	0.15	Up
comp29995_c0_seq6	6.88	6.38	0.06	0.05	Up
comp30007_c0_seq18	7.07	6.97	0.08	0.09	Up
comp30036_c0_seq4	10.31	10.5	0.1	0.1	Up
comp30043_c0_seq2	15.87	15.68	0.1	0.06	Up
comp30051_c0_seq12	28.58	25.55	0.16	0.18	Up
comp30052_c1_seq9	43.14	41.75	0.15	0.16	Up
comp30056_c0_seq1	13.73	11.14	0.05	0.05	Up
comp30058_c0_seq3	50.95	15.41	0.18	0.36	Up
comp30097_c0_seq3	14.92	17.98	0.3	0.35	Up
comp30098_c0_seq9	14.56	15.48	0.33	0.32	Up
comp30101_c1_seq13	17.46	15.78	0.2	0.19	Up
comp30104_c0_seq4	10.11	8.92	0.1	0.07	Up
comp30114_c0_seq1	11.81	11.71	0.06	0.07	Up
comp30133_c1_seq5	22.4	14.89	0.06	0.06	Up
comp30142_c0_seq59	117.53	45.95	0.88	0.94	Up
comp30165_c0_seq1	8.06	9.19	0.1	0.09	Up
comp30166_c0_seq9	8.75	13.11	0.08	0.06	Up
comp30189_c0_seq3	9.44	9.05	0.06	0.07	Up
comp30233_c0_seq10	7.07	7.57	0.2	0.2	Up
comp30256_c0_seq11	16.23	16.37	0.08	0.06	Up
comp30268_c0_seq49	9.96	10.96	0.1	0.08	Up
comp30272_c0_seq30	20.24	14.25	0.53	0.49	Up
comp30295_c0_seq2	14.09	12.36	0.24	0.23	Up
comp30306_c1_seq4	12.9	13.04	0.12	0.11	Up
comp30397_c0_seq2	20.36	24.31	0.12	0.1	Up
comp30431_c0_seq24	17.21	16.76	0.21	0.21	Up
comp30432_c0_seq1	20.76	19.58	0.07	0.08	Up
comp30435_c0_seq3	14.87	14.04	0.1	0.1	Up
comp30620_c0_seq11	46.32	44.83	0.07	0.05	Up
comp30625_c0_seq4	21.38	16.28	0.11	0.08	Up
comp30647_c0_seq1	8.72	8.26	0.11	0.08	Up
comp30656_c1_seq1	10.3	11.15	0.08	0.11	Up
comp30668_c0_seq9	24.34	24.1	0.21	0.25	Up
comp30712_c0_seq5	19.49	19.01	0.04	0.04	Up
comp30735_c0_seq3	22.11	21.95	0.3	0.28	Up
comp30789_c1_seq1	10.19	10.45	0.1	0.08	Up
comp30795_c0_seq11	11.19	9.04	0.08	0.11	Up
comp30810_c0_seq3	9.41	8.9	0.11	0.1	Up
comp30838_c1_seq7	15.05	15.87	0.14	0.11	Up
comp30873_c0_seq8	14.9	18.89	0.17	0.11	Up
comp30898_c0_seq3	118.54	142.98	2.1	2.09	Up
comp30901_c1_seq3	21	20.86	0.09	0.04	Up
comp30919_c0_seq6	18.6	15.1	0.24	0.21	Up
comp30959_c0_seq10	18.13	14.97	0.07	0.1	Up
comp30964_c0_seq3	11.08	10.06	0.09	0.07	Up
comp30967_c0_seq3	22.52	21.52	0.1	0.06	Up
comp30989_c0_seq43	14.69	12.61	0.12	0.14	Up
comp30997_c0_seq4	5.03	5.59	0.11	0.12	Up
comp31012_c0_seq12	20.62	21.58	0.37	0.3	Up
comp31022_c0_seq3	16.04	12.42	0.15	0.13	Up
comp31030_c0_seq5	13.22	12.75	0.12	0.1	Up
comp31064_c0_seq59	8.01	14.99	0.07	0.06	Up
comp31086_c0_seq4	11.02	13.34	2.01	1.94	Up
comp31102_c0_seq2	13.98	13.35	0.15	0.13	Up
comp31117_c0_seq38	15.6	11.52	0.11	0.08	Up
comp31119_c0_seq9	13.14	12.13	0.14	0.11	Up
comp31123_c0_seq3	11.05	10.03	0.13	0.09	Up
comp31124_c0_seq5	14.97	19.27	0.1	0.11	Up
comp31178_c0_seq2	27.82	25.04	0.08	0.04	Up
comp31197_c0_seq2	21.83	17.56	0.24	0.13	Up
comp31217_c0_seq27	13.8	10.92	0.1	0.1	Up
comp31228_c0_seq1	20.58	17.1	0.08	0.09	Up
comp31253_c0_seq5	13.72	9.8	0.16	0.1	Up
comp31264_c0_seq2	6.07	8.21	0.16	0.11	Up
comp31280_c0_seq2	8.88	12	0.11	0.11	Up
comp31282_c0_seq1	17.15	16.9	0.11	0.15	Up
comp31295_c1_seq10	11.06	11.65	0.13	0.09	Up
comp3133_c0_seq2	91.98	77.56	15.48	12.53	Up
comp31387_c0_seq11	11.03	16.76	0.09	0.08	Up
comp31428_c1_seq12	30.65	27.59	0.08	0.07	Up
comp31434_c0_seq4	6.62	8.51	0.08	0.07	Up
comp31464_c0_seq12	12.55	19.53	0.2	0.14	Up
comp31500_c0_seq11	13.27	12.69	0.08	0.08	Up
comp31501_c0_seq21	9.23	8.95	0.07	0.1	Up
comp3153_c0_seq2	18.86	19.54	0.32	0.32	Up
comp31609_c0_seq9	34.71	33.42	0.1	0.09	Up
comp31623_c0_seq12	10.44	14.62	0.15	0.14	Up
comp31657_c0_seq13	37.85	36.32	0.1	0.14	Up
comp31677_c0_seq2	6.19	5.1	0.04	0.04	Up
comp31712_c4_seq20	19.12	20.53	0.09	0.07	Up
comp31714_c0_seq4	13.71	11.98	0.07	0.07	Up
comp31736_c0_seq1	16.73	14.78	0.23	0.22	Up
comp3174_c0_seq1	13.01	13.95	0.16	0.23	Up
comp31781_c0_seq4	22.3	24.9	0.2	0.22	Up
comp31806_c0_seq6	16.04	17.71	0.08	0.06	Up
comp31815_c0_seq6	10.44	7.92	0.12	0.11	Up
comp31897_c0_seq9	14.24	14.43	0.27	0.27	Up
comp31907_c0_seq237	18.9	23.34	0.22	0.21	Up
comp31928_c0_seq13	11.55	13.71	0.14	0.09	Up
comp31939_c0_seq170	51.18	53.18	0.34	0.31	Up
comp31944_c0_seq25	15.37	11.79	0.19	0.15	Up
comp31959_c0_seq9	9.34	10.05	0.05	0.04	Up
comp32015_c0_seq2	17.71	19.16	0.34	0.43	Up
comp32072_c0_seq8	20.39	19.03	0.08	0.09	Up
comp32103_c0_seq2	11.08	10.69	0.17	0.06	Up
comp32109_c0_seq6	19.01	18.42	0.34	0.41	Up
comp32145_c0_seq5	10.47	9.41	0.08	0.09	Up
comp32157_c0_seq4	12.47	11.03	0.13	0.16	Up
comp32178_c1_seq2	195.21	145.65	2.1	0.85	Up
comp32178_c2_seq9	36.65	33.46	0.07	0.05	Up
comp32186_c0_seq2	25.85	24.67	0.44	0.43	Up
comp32212_c0_seq17	11.35	14.7	0.06	0.05	Up
comp32221_c0_seq4	8.93	11.64	0.04	0.05	Up
comp32229_c1_seq8	23.75	21.75	0.2	0.15	Up
comp32265_c1_seq38	79.37	68.13	0.16	0.16	Up
comp32287_c0_seq2	24.47	26.19	0.12	0.11	Up
comp32309_c0_seq3	12.09	8.77	0.08	0.06	Up
comp32316_c0_seq30	18.13	15.56	0.42	0.38	Up
comp32327_c0_seq1	22.47	22.61	0.15	0.28	Up
comp32357_c0_seq97	8.43	9.16	0.14	0.13	Up
comp32391_c0_seq2	16.57	21.94	0.17	0.17	Up
comp32395_c0_seq6	7.32	9.47	0.08	0.09	Up
comp32407_c0_seq4	7.18	7.38	0.06	0.06	Up
comp32412_c0_seq16	18.99	14.72	0.35	0.42	Up
comp32420_c2_seq1	12.29	12.24	0.26	0.26	Up
comp32426_c0_seq45	25.1	27.52	0.07	0.1	Up
comp32433_c0_seq4	11	11.42	0.06	0.03	Up
comp32457_c0_seq16	14.31	11.38	0.54	0.39	Up
comp32462_c0_seq19	17.69	15.78	0.1	0.12	Up
comp32517_c0_seq1	8.18	7.91	0.11	0.08	Up
comp32527_c0_seq7	8.26	6.31	0.1	0.06	Up
comp32548_c0_seq4	5.23	6.83	0.14	0.12	Up
comp32555_c0_seq11	11.99	11.79	0.04	0.04	Up
comp32577_c0_seq5	7.98	7.09	0.15	0.12	Up
comp32588_c0_seq101	19.81	19.22	0.23	0.3	Up
comp32591_c0_seq24	23.84	19.57	0.07	0.07	Up
comp32627_c0_seq6	29.81	10.25	0.05	0.08	Up
comp32632_c0_seq1	11.58	11.38	0.11	0.14	Up
comp32662_c0_seq2	7.67	8.05	0.12	0.14	Up
comp32664_c0_seq1	13.29	14.24	0.1	0.08	Up
comp32666_c0_seq23	12.75	12.75	0.21	0.21	Up
comp32705_c0_seq12	30.43	29.89	0.09	0.1	Up
comp32710_c0_seq24	4.25	4.93	0.06	0.05	Up
comp32716_c0_seq53	66.12	79.12	0.17	0.16	Up
comp32718_c0_seq13	10.75	10.05	0.11	0.08	Up
comp32722_c0_seq21	17.67	15.39	0.05	0.06	Up
comp32752_c0_seq4	18.02	14.79	0.12	0.11	Up
comp32756_c0_seq2	19.36	21.17	0.11	0.1	Up
comp32761_c0_seq5	12.85	11.76	0.12	0.11	Up
comp32770_c0_seq1	18.79	18.95	0.15	0.12	Up
comp32776_c0_seq2	10.84	9.37	0.09	0.06	Up
comp32799_c0_seq1	7.65	5.87	0.08	0.08	Up
comp32808_c0_seq32	32.47	31.57	0.08	0.07	Up
comp32816_c0_seq5	9.23	9.94	0.13	0.1	Up
comp3285_c0_seq1	19.31	17.26	0.1	0.13	Up
comp32852_c0_seq6	5.51	4.89	0.07	0.04	Up
comp32868_c0_seq1	13.07	10.97	0.18	0.23	Up
comp32880_c0_seq5	12.67	14.78	0.14	0.21	Up
comp32884_c1_seq83	10.63	11.7	0.07	0.05	Up
comp32949_c0_seq1	10.75	8.79	0.1	0.11	Up
comp32951_c0_seq18	13.3	16.7	0.19	0.14	Up
comp32978_c0_seq7	10.92	11.29	0.14	0.17	Up
comp32987_c0_seq7	7.27	6.94	0.08	0.07	Up
comp33055_c0_seq9	12.09	11.94	0.15	0.11	Up
comp33104_c0_seq28	18.32	14.94	0.11	0.1	Up
comp33116_c0_seq1	14.15	13.47	0.12	0.17	Up
comp33120_c0_seq2	8.04	7.79	0.09	0.08	Up
comp33135_c0_seq11	8.04	10.9	0.11	0.1	Up
comp33141_c0_seq4	6.28	6.83	0.08	0.06	Up
comp33145_c0_seq1	6.37	8.12	0.07	0.06	Up
comp33165_c0_seq29	20.56	14.14	0.16	0.12	Up
comp33191_c0_seq45	17.88	18.19	0.04	0.04	Up
comp33210_c0_seq3	10	15.72	0.05	0.03	Up
comp33211_c0_seq61	7.9	7.78	0.11	0.08	Up
comp33217_c0_seq5	8.43	4.85	0.14	0.13	Up
comp33225_c0_seq13	38.28	21.32	1.97	2	Up
comp33236_c0_seq30	14.83	14.93	0.22	0.18	Up
comp33240_c0_seq3	7.53	9.96	0.05	0.1	Up
comp33258_c0_seq4	6.08	5.73	0.06	0.05	Up
comp33281_c0_seq2	70.13	62.89	0.07	0.07	Up
comp33282_c0_seq7	15.25	26.11	0.15	0.17	Up
comp33298_c0_seq6	10.41	9.31	0.11	0.09	Up
comp33309_c0_seq2	8.8	8.69	0.07	0.07	Up
comp33320_c0_seq33	5.83	5.16	0.07	0.07	Up
comp33349_c0_seq12	5.86	5.95	0.14	0.15	Up
comp33359_c0_seq8	8.44	9.25	0.15	0.16	Up
comp33377_c0_seq1	18.34	23.7	0.07	0.06	Up
comp33409_c0_seq2	6.38	7.59	0.13	0.07	Up
comp33415_c0_seq5	8.49	7.19	0.08	0.06	Up
comp33434_c0_seq9	6.39	7.62	0.09	0.06	Up
comp33454_c0_seq229	13.07	13.07	0.05	0.05	Up
comp33458_c0_seq52	6.17	6.96	0.07	0.06	Up
comp33482_c0_seq9	9.54	11	0.05	0.06	Up
comp33483_c0_seq1	9.85	9.63	0.05	0.07	Up
comp33511_c0_seq29	16.07	19.03	0.75	0.8	Up
comp33540_c0_seq3	43.03	34.78	0.11	0.12	Up
comp33549_c0_seq10	4.54	4.89	0.05	0.04	Up
comp33559_c0_seq32	7.78	7.04	0.09	0.07	Up
comp33563_c0_seq2	16.24	17.42	0.2	0.15	Up
comp33578_c0_seq28	4.56	6	0.05	0.04	Up
comp33579_c0_seq83	18.75	22.02	0.2	0.11	Up
comp33582_c0_seq5	17.01	19.16	0.09	0.08	Up
comp33583_c0_seq2	4.47	6.3	0.05	0.06	Up
comp33594_c0_seq4	9.6	11.46	0.19	0.21	Up
comp33605_c0_seq11	12.6	11.74	0.06	0.03	Up
comp33620_c0_seq11	10.89	11.62	0.16	0.14	Up
comp33640_c0_seq2	13.54	15.49	0.12	0.15	Up
comp33651_c0_seq15	11.24	9.38	0.15	0.11	Up
comp33657_c0_seq50	6.69	6.76	0.06	0.05	Up
comp33658_c0_seq6	7.92	8.98	0.05	0.07	Up
comp33664_c0_seq17	9.77	10.31	0.1	0.08	Up
comp33674_c0_seq289	12.61	11.38	0.15	0.11	Up
comp33677_c0_seq16	27.87	25.09	0.09	0.1	Up
comp33679_c0_seq13	8.08	9.13	0.12	0.11	Up
comp33680_c0_seq38	6.01	5.87	0.07	0.06	Up
comp33698_c0_seq5	6.99	5.28	0.09	0.08	Up
comp33705_c0_seq12	12.63	12.63	0.08	0.07	Up
comp33711_c0_seq1	8.48	8.53	0.07	0.06	Up
comp33719_c0_seq5	5.94	5.66	0.08	0.08	Up
comp33732_c0_seq1	11.25	12.63	0.1	0.12	Up
comp33742_c0_seq8	13.99	11.52	0.12	0.07	Up
comp33746_c1_seq6	15.71	13.74	0.09	0.08	Up
comp33748_c0_seq16	5.85	5.23	0.06	0.04	Up
comp33752_c0_seq7	6.05	6.64	0.06	0.05	Up
comp33753_c0_seq6	6.01	6.54	0.1	0.1	Up
comp33756_c0_seq50	6.99	6.98	0.07	0.08	Up
comp33761_c0_seq2	8.32	7.12	0.13	0.14	Up
comp33763_c1_seq35	13.26	13.21	0.08	0.07	Up
comp33765_c0_seq2	11.74	12.64	0.06	0.07	Up
comp33767_c0_seq5	101.77	92.06	0.23	0.2	Up
comp33771_c0_seq16	9.05	10.32	0.11	0.1	Up
comp33776_c0_seq7	11.35	9.63	0.07	0.07	Up
comp33782_c0_seq33	10.27	8.99	0.16	0.11	Up
comp33784_c0_seq8	8.2	8.8	0.07	0.1	Up
comp33787_c0_seq133	5.41	4.56	0.06	0.05	Up
comp33792_c0_seq5	9.8	9.07	0.11	0.08	Up
comp33797_c0_seq7	8.63	8.35	0.05	0.05	Up
comp33813_c0_seq7	8.83	8.44	0.11	0.1	Up
comp33829_c0_seq36	7.19	5.98	0.09	0.12	Up
comp33830_c0_seq6	32.08	25.52	0.12	0.24	Up
comp33837_c0_seq75	7.35	7.5	0.06	0.05	Up
comp33838_c1_seq6	92.63	87.54	0.44	0.4	Up
comp33840_c0_seq36	9.15	8.43	0.05	0.03	Up
comp33841_c0_seq17	12.52	7.99	0.08	0.05	Up
comp33843_c0_seq8	10.4	9.85	0.05	0.05	Up
comp33846_c0_seq168	10.78	16.44	0.08	0.08	Up
comp33847_c0_seq1	4.72	6.56	0.1	0.09	Up
comp33852_c0_seq42	8.77	8.98	0.04	0.03	Up
comp33857_c0_seq80	18.31	22.82	0.12	0.11	Up
comp33857_c1_seq20	13.95	13.46	0.13	0.09	Up
comp33859_c0_seq7	12.16	10.49	0.17	0.15	Up
comp33866_c0_seq19	5.67	6.91	0.07	0.06	Up
comp33868_c0_seq4	10.1	7.73	0.06	0.07	Up
comp33872_c1_seq5	223	271.33	16.5	14.92	Up
comp33877_c0_seq60	21.61	2.8	0.2	0.25	Up
comp33884_c0_seq53	9.93	10.26	0.04	0.03	Up
comp33886_c1_seq14	8.12	8.2	0.04	0.02	Up
comp33887_c0_seq195	6.4	6.13	0.03	0.02	Up
comp33889_c0_seq44	11.71	9.9	0.03	0.03	Up
comp33890_c0_seq7	25.57	40.11	0.24	0.21	Up
comp33893_c0_seq1	57.09	49.77	0.47	0.72	Up
comp33895_c3_seq1	8.01	7.43	0.06	0.04	Up
comp33900_c1_seq3	7.04	6.31	0.07	0.04	Up
comp33903_c0_seq2	5.89	6.17	0.04	0.03	Up
comp33904_c0_seq4	19.18	22.07	0.18	0.1	Up
comp33910_c0_seq214	10.23	8.7	0.03	0.03	Up
comp33913_c0_seq48	14.32	20.3	0.06	0.04	Up
comp33917_c0_seq3	15.64	16	0.11	0.08	Up
comp33922_c0_seq1	912	889.34	2.41	2.72	Up
comp33944_c0_seq1	15.2	15.22	5.08	4.57	Up
comp33946_c0_seq1	356.58	342.22	0.41	0.52	Up
comp33955_c0_seq1	2630.67	2462.26	3.47	2.64	Up
comp33958_c0_seq1	1487.95	1654.85	6.52	5.72	Up
comp33959_c0_seq1	2393.9	2155.32	2.96	2.92	Up
comp33962_c0_seq1	1.42	1.09	2446.3	2824.56	Down
comp33968_c0_seq1	199.59	238.24	4.39	4.42	Up
comp33970_c0_seq1	40.52	46.77	0.8	0.71	Up
comp33973_c0_seq1	1148.94	862.68	2.73	2.98	Up
comp33980_c0_seq1	1914.87	1796.8	5.74	5.51	Up
comp33984_c0_seq1	71.67	60.43	3.71	3.07	Up
comp33988_c0_seq1	1322.69	1067.88	6.33	4.08	Up
comp33990_c0_seq1	576.56	623.58	0.64	0.49	Up
comp33992_c0_seq1	561.71	549.63	3.57	2.65	Up
comp33993_c0_seq1	793.7	778.82	2.28	2.03	Up
comp34000_c0_seq1	624.42	603.87	4.17	2.6	Up
comp34001_c0_seq1	807.88	718.54	3.33	2.45	Up
comp34004_c0_seq1	1256.28	1082.46	7.22	6.72	Up
comp34005_c0_seq1	939.81	932.96	1.83	1.64	Up
comp34007_c0_seq1	1191.38	1240.64	3.28	3.01	Up
comp34008_c0_seq1	874.78	833.49	2.29	2.21	Up
comp34010_c0_seq1	954.72	573.6	2.94	1.25	Up
comp34011_c0_seq1	691.41	667.57	2.29	1.86	Up
comp34014_c0_seq1	1406.71	1584	3.44	3.45	Up
comp34016_c0_seq1	298.87	258.87	0.52	0.81	Up
comp34022_c0_seq1	840.05	790.53	2.93	2.89	Up
comp34023_c0_seq1	334.09	501.67	1.57	0.59	Up
comp34024_c0_seq1	318.56	335.99	4.31	2.99	Up
comp34026_c0_seq1	1213.19	1318.71	3.63	5.37	Up
comp34028_c0_seq1	510.6	465.33	3.55	2.87	Up
comp34029_c0_seq1	998.65	946.16	1.85	5.87	Up
comp34032_c0_seq1	493.62	435.56	1.66	1.89	Up
comp34035_c0_seq1	1036.21	1120.06	3.36	2.95	Up
comp34046_c0_seq1	84.86	68.64	5.06	4.28	Up
comp34047_c0_seq1	350.43	365.1	1.5	1.41	Up
comp34049_c0_seq1	62.7	51.28	2.41	2.06	Up
comp34052_c0_seq1	953.91	979.51	3.01	6.28	Up
comp34053_c0_seq1	86.49	126.77	1.94	2.39	Up
comp34056_c0_seq1	439.79	441.7	1.96	2.56	Up
comp34066_c0_seq1	92.3	93.69	0.95	1.01	Up
comp34067_c0_seq1	8.89	7.91	3.07	2.59	Up
comp34068_c0_seq1	331.22	322.36	2.03	2.05	Up
comp34070_c0_seq1	45.03	44.94	1.06	0.93	Up
comp34073_c0_seq1	774.43	939.45	3.24	2.8	Up
comp34077_c0_seq1	1188.23	901.7	3.81	3.05	Up
comp34084_c0_seq1	479.7	469.48	1.74	1.28	Up
comp34087_c0_seq1	376.48	475.16	1.75	1.12	Up
comp34088_c0_seq1	584.88	458.69	1	1.04	Up
comp34089_c0_seq1	401.89	588.68	2.9	2.18	Up
comp34095_c0_seq1	605.84	641.51	1.78	1.61	Up
comp34098_c0_seq1	630.9	426.34	4.9	3.86	Up
comp34099_c0_seq1	995.42	940.45	2.68	3.29	Up
comp34100_c0_seq1	391.87	381.42	1.86	1.36	Up
comp34105_c0_seq1	539.13	690.3	3.03	2.45	Up
comp34106_c0_seq1	434.61	470.68	1.48	0.92	Up
comp34111_c0_seq1	588.02	518.62	2.45	2.48	Up
comp34112_c0_seq1	386.43	610.75	2.61	1.77	Up
comp34119_c0_seq1	5.72	5.12	1.44	1.92	Up
comp34126_c0_seq1	380.55	291.01	1.49	0.54	Up
comp34127_c0_seq1	267.66	459.17	0.92	0.69	Up
comp34133_c0_seq1	540.68	502.29	1.74	2.46	Up
comp34134_c0_seq1	275.28	353.02	1.42	1.1	Up
comp34137_c0_seq1	67.32	55.82	0.38	0.42	Up
comp34138_c0_seq1	1298.96	1162.03	1.19	0.93	Up
comp34140_c0_seq1	359.21	355.12	1.8	1.26	Up
comp34142_c0_seq1	5.06	4.28	1.59	1.41	Up
comp34147_c0_seq1	7.84	5.62	1.25	1.18	Up
comp34149_c0_seq1	503.77	511.03	1.1	0.84	Up
comp3415_c0_seq1	36.43	31.81	0.26	0.21	Up
comp34154_c0_seq1	546.64	488.03	1.18	0.92	Up
comp34159_c0_seq1	368.27	320.51	1.96	2.3	Up
comp34164_c0_seq1	42.62	29.45	1.18	1.24	Up
comp34180_c0_seq1	674.9	218.84	2.41	1.93	Up
comp34189_c0_seq1	188.14	242.07	1.83	1.48	Up
comp34191_c0_seq1	1199.88	1181.39	1.61	1.34	Up
comp34193_c0_seq1	349.6	268.91	2.32	1.73	Up
comp34194_c0_seq1	363.26	428.36	1.89	0.84	Up
comp34198_c0_seq1	409.21	433.28	2.04	1.63	Up
comp34206_c0_seq1	29.2	21.74	0.88	0.79	Up
comp34207_c0_seq1	296.51	213.06	0.28	0.26	Up
comp34211_c0_seq1	86.66	80.58	1.01	1.29	Up
comp34217_c0_seq1	177.38	180	1.45	1.22	Up
comp34218_c0_seq1	393.72	418.11	0.83	0.7	Up
comp34219_c0_seq1	361.51	536.8	1.28	1	Up
comp34222_c0_seq1	333.58	350.51	1.55	0.78	Up
comp34223_c0_seq1	344.21	295.62	1.39	0.91	Up
comp34252_c0_seq1	207.5	170.87	0.67	0.51	Up
comp34257_c0_seq1	56.1	65.84	0.33	0.27	Up
comp34259_c0_seq1	219.97	213.14	1.11	1.04	Up
comp34265_c0_seq1	1089.34	195.41	0.33	0.43	Up
comp34288_c0_seq1	379.31	338.12	1.36	1.19	Up
comp34289_c0_seq1	351.49	321.06	1.42	1.55	Up
comp34299_c0_seq1	563.53	548.66	0.61	0.65	Up
comp34305_c0_seq1	76.62	83.38	0.46	0.3	Up
comp34314_c0_seq1	93.78	121.53	0.81	1.55	Up
comp34316_c0_seq1	270.01	264.64	0.8	1.15	Up
comp34338_c0_seq1	63.51	61.64	0.43	0.32	Up
comp34345_c0_seq1	327.74	338.16	0.99	1.15	Up
comp34351_c0_seq1	141.53	147.65	0.51	0.4	Up
comp34360_c0_seq1	53.47	47.62	0.24	0.16	Up
comp34361_c0_seq1	129.02	119.72	0.52	0.54	Up
comp34365_c0_seq1	124.41	135.9	0.78	0.86	Up
comp34374_c0_seq1	379.84	418.05	1.59	1.7	Up
comp34392_c0_seq1	124.72	128.63	0.44	0.43	Up
comp34397_c0_seq1	172.07	146.16	2.18	1.62	Up
comp34400_c0_seq1	76.72	77.03	1.13	1.22	Up
comp34410_c0_seq1	160.25	142.49	0.35	0.3	Up
comp34431_c0_seq1	319.71	290.23	0.69	0.65	Up
comp34432_c0_seq1	44.89	41.72	0.21	0.3	Up
comp34440_c0_seq1	297.75	336.21	1.09	1.13	Up
comp34443_c0_seq1	67.04	59	0.15	0.24	Up
comp34452_c0_seq1	349.07	299.01	0.96	0.94	Up
comp34457_c0_seq1	272.14	149.61	1.55	2.24	Up
comp34459_c0_seq1	275.45	246.66	2	1.91	Up
comp34470_c0_seq1	155.95	141.74	0.68	0.5	Up
comp34471_c0_seq1	21.95	20.06	558.08	511.82	Down
comp34486_c0_seq1	369.07	419.92	1.65	1.42	Up
comp34487_c0_seq1	217.22	218.41	3.43	2.86	Up
comp34507_c0_seq1	93.02	102.29	0.26	0.21	Up
comp34521_c0_seq1	202	188.39	2.52	1.08	Up
comp34523_c0_seq1	108.75	105.76	0.22	0.17	Up
comp34532_c0_seq1	309.79	304.87	1	0.77	Up
comp34541_c0_seq1	8.29	7.91	1.09	0.91	Up
comp34543_c0_seq1	186.03	164.12	28.91	38.65	Up
comp34551_c0_seq1	105.86	133.52	0.39	0.37	Up
comp34554_c0_seq1	86.29	68.2	0.52	0.58	Up
comp34574_c0_seq1	212.12	198.02	0.76	1.33	Up
comp34575_c0_seq1	45.9	46.79	0.23	0.47	Up
comp34582_c0_seq1	95.02	97.71	0.58	0.87	Up
comp34596_c0_seq1	82.99	74.87	0.33	0.4	Up
comp34638_c0_seq1	108.47	86.95	0.54	0.55	Up
comp34650_c1_seq1	648.24	691.66	53.81	54.75	Up
comp34655_c0_seq1	6.34	5.4	0.3	0.23	Up
comp34657_c0_seq1	64.52	59.93	0.91	0.58	Up
comp34672_c0_seq1	45	42.17	0.24	0.29	Up
comp34695_c0_seq1	185.76	177.72	0.12	0.13	Up
comp34697_c0_seq1	52.2	54	0.99	0.98	Up
comp34698_c0_seq1	25.45	24.83	0.48	0.56	Up
comp34707_c0_seq1	324.7	320.23	73.69	43.75	Up
comp34709_c0_seq1	211.51	157.85	0.82	0.81	Up
comp34738_c0_seq1	113.9	104.99	1.39	1.15	Up
comp34772_c0_seq1	136.73	101.17	0.59	0.47	Up
comp34791_c0_seq1	10.82	10.39	0.43	0.41	Up
comp34854_c0_seq1	109.9	105.16	0.32	0.35	Up
comp34881_c0_seq1	71.68	65.72	0.95	1.06	Up
comp34890_c0_seq1	44.27	32.86	0.52	0.25	Up
comp34897_c0_seq1	60.36	58.32	0.82	0.76	Up
comp34908_c0_seq1	72.23	95.15	0.36	0.2	Up
comp34910_c0_seq1	42.59	48.65	0.32	0.29	Up
comp34923_c0_seq1	79.78	87.59	0.94	0.91	Up
comp34925_c0_seq1	56.86	56.95	8.39	8.58	Up
comp34926_c0_seq1	100.48	75.97	0.41	0.35	Up
comp34928_c0_seq1	259.34	239.65	0.25	0.31	Up
comp34931_c0_seq1	116.35	113.57	0.16	0.15	Up
comp34934_c0_seq1	15.41	24.75	0.15	0.12	Up
comp34936_c0_seq1	29.15	34.6	0.3	0.27	Up
comp34948_c0_seq1	5.75	4.29	1.47	1.57	Up
comp34957_c0_seq1	125.75	122.71	0.32	0.26	Up
comp34961_c0_seq1	113.79	125.63	0.53	0.45	Up
comp34976_c0_seq1	75.77	62.33	1.06	1.19	Up
comp34981_c0_seq1	90.15	94.99	0.28	0.22	Up
comp34990_c0_seq1	47.57	45.79	0.42	0.41	Up
comp34991_c0_seq1	41.65	41.99	1.04	0.72	Up
comp35002_c0_seq1	99.77	85.34	1.32	0.52	Up
comp35003_c0_seq1	60.08	46.72	0.34	0.29	Up
comp35008_c0_seq1	26.07	26.05	0.21	0.24	Up
comp35013_c0_seq1	33.61	30.77	0.16	0.19	Up
comp35015_c0_seq1	104.68	87.02	0.35	0.28	Up
comp35041_c0_seq1	27.6	28.1	0.16	0.1	Up
comp35053_c0_seq1	77.29	70.84	1.06	0.77	Up
comp35065_c0_seq1	115.8	115.39	0.28	0.14	Up
comp35066_c0_seq1	76.97	85.9	0.25	0.22	Up
comp35068_c0_seq1	4.7	4.66	0.46	0.34	Up
comp35074_c0_seq1	206.61	249.77	0.32	0.34	Up
comp35086_c0_seq1	50.31	72.27	0.44	0.4	Up
comp35109_c0_seq1	10.46	11.23	255.02	266.58	Down
comp35116_c0_seq1	53.33	48.27	0.4	0.3	Up
comp35121_c0_seq1	52.23	58.57	0.7	0.44	Up
comp35123_c0_seq1	42.44	38.25	0.16	0.16	Up
comp35131_c0_seq1	48.98	47.39	0.63	0.71	Up
comp35152_c0_seq1	115.78	124.78	1.91	2.01	Up
comp35153_c0_seq1	58.73	52.96	0.17	0.19	Up
comp35165_c0_seq1	93.82	109.47	0.67	0.59	Up
comp35170_c0_seq1	35.03	31.03	0.18	0.17	Up
comp35189_c0_seq1	4.49	4.28	0.51	0.37	Up
comp35210_c0_seq1	2.75	2.75	0.34	0.28	Up
comp35214_c0_seq1	3.04	2.91	0.23	0.21	Up
comp35221_c0_seq1	43.37	54.9	0.71	0.53	Up
comp35233_c0_seq1	26.21	21.61	0.2	0.14	Up
comp35244_c0_seq1	29.95	29.23	0.48	0.48	Up
comp35251_c0_seq1	56.58	60.15	0.6	0.59	Up
comp35261_c0_seq1	34.67	34.3	0.47	0.48	Up
comp35263_c0_seq1	44.01	46.29	0.37	0.31	Up
comp35278_c0_seq1	42.16	36.89	0.32	0.36	Up
comp35298_c0_seq1	56.29	75.65	0.3	0.33	Up
comp35313_c0_seq1	27.94	24.79	0.17	0.15	Up
comp35326_c0_seq1	27	24.76	0.28	0.27	Up
comp35330_c0_seq1	152.77	137.94	0.43	0.63	Up
comp35345_c0_seq1	20.08	18.4	0.28	0.29	Up
comp35347_c0_seq1	90.35	91.3	1.03	0.82	Up
comp35361_c0_seq1	79.94	74.73	1.01	0.85	Up
comp35362_c0_seq1	36.27	34.74	0.29	0.22	Up
comp35367_c0_seq1	7.76	9.55	177.71	166.32	Down
comp35371_c0_seq1	49.36	54.43	0.98	0.88	Up
comp35390_c0_seq1	3.92	4.64	245.73	232.77	Down
comp35391_c0_seq1	111.83	126.24	0.25	0.21	Up
comp35398_c0_seq1	57.28	64.69	0.38	0.14	Up
comp35401_c0_seq1	24.81	25.37	0.35	0.24	Up
comp35403_c0_seq1	50.31	46.35	0.89	0.85	Up
comp35427_c0_seq1	48.13	44.24	0.54	0.67	Up
comp35430_c0_seq1	35.45	44.63	0.22	0.26	Up
comp35456_c0_seq1	45.24	30.62	0.28	0.22	Up
comp35458_c0_seq1	30.65	28.41	0.81	0.69	Up
comp35483_c0_seq1	25.57	25.18	0.29	0.23	Up
comp35484_c0_seq1	39.54	35.25	0.18	0.16	Up
comp35500_c0_seq1	34.96	35	1.44	1.28	Up
comp35502_c0_seq1	110.6	94.54	0.91	0.84	Up
comp35532_c0_seq1	35.63	34.05	1.33	1.4	Up
comp35543_c0_seq1	160.37	164.57	0.71	0.52	Up
comp35582_c0_seq1	12.08	10.44	124.81	130.82	Down
comp35583_c0_seq1	38.76	51.18	0.23	0.25	Up
comp35585_c0_seq1	23.53	17.84	0.41	0.41	Up
comp35589_c0_seq1	81.9	33.84	1.32	1.67	Up
comp35594_c0_seq1	26.46	23.55	0.36	0.53	Up
comp35596_c0_seq1	74.77	68.62	1.71	3.26	Up
comp35597_c0_seq1	0.55	0.74	204.69	195.73	Down
comp35619_c0_seq1	32.31	41.21	0.92	0.91	Up
comp35626_c0_seq1	18.26	14.74	0.18	0.18	Up
comp35654_c0_seq1	26.07	28.87	0.38	0.31	Up
comp35668_c0_seq1	46.3	39.99	2.23	2.05	Up
comp35697_c0_seq1	127.48	149.29	0.33	0.12	Up
comp35707_c0_seq1	36.68	47.68	0.2	0.21	Up
comp35731_c0_seq1	41.3	58.05	0.18	0.21	Up
comp35751_c0_seq1	66.58	71.53	0.22	0.27	Up
comp35762_c0_seq1	38.36	33.51	0.56	0.51	Up
comp35768_c0_seq1	201.61	257.57	15.61	12.93	Up
comp35770_c0_seq1	147.23	130.65	1.56	1.28	Up
comp35788_c0_seq1	45.48	53.13	0.23	0.1	Up
comp35809_c0_seq1	112.74	94.9	0.59	0.56	Up
comp35827_c0_seq1	97.74	32.44	0.21	0.22	Up
comp35846_c0_seq1	65.24	65.91	0.21	0.16	Up
comp35877_c0_seq1	27.06	25.04	335.68	292.52	Down
comp35887_c0_seq1	147.61	120.08	17.41	12.39	Up
comp35891_c0_seq1	61.34	68.65	0.12	0.12	Up
comp35896_c0_seq1	42.99	37.49	0.3	0.3	Up
comp35937_c0_seq1	28.89	28.11	0.4	0.39	Up
comp35978_c0_seq1	34.92	44.99	0.43	0.36	Up
comp35982_c0_seq1	28.16	28.07	0.42	0.36	Up
comp35988_c0_seq1	35.56	25.19	0.38	0.28	Up
comp35993_c0_seq1	36.62	47.26	0.12	0.1	Up
comp35998_c0_seq1	56.99	52.09	0.11	0.11	Up
comp36043_c0_seq1	24.29	21.62	0.26	0.35	Up
comp36047_c0_seq1	106.8	89.22	0.15	0.15	Up
comp36056_c0_seq1	48.97	65.01	0.24	0.2	Up
comp36121_c0_seq1	91.19	94.09	0.46	0.43	Up
comp36143_c0_seq1	78.03	62.99	0.5	0.43	Up
comp36166_c0_seq1	13.12	11.73	0.17	0.1	Up
comp36216_c0_seq1	48.39	51.6	0.14	0.09	Up
comp36222_c0_seq1	37.18	43.08	0.25	0.25	Up
comp36225_c0_seq1	116.57	88.85	0.55	0.51	Up
comp36232_c0_seq1	29.26	24.03	0.14	0.23	Up
comp36277_c0_seq1	151.48	144.86	0.64	0.58	Up
comp36297_c0_seq1	31.64	25.28	0.21	0.24	Up
comp36330_c0_seq1	42.68	42.73	0.34	0.33	Up
comp36338_c0_seq1	57.41	66	0.22	0.17	Up
comp36346_c0_seq1	9.63	8.09	0.1	0.08	Up
comp36374_c0_seq1	37.45	49.14	0.18	0.21	Up
comp36375_c0_seq1	14.54	12.49	0.18	0.03	Up
comp36377_c0_seq1	87.39	69.63	1.18	1.09	Up
comp36383_c0_seq1	27.14	25.59	0.15	0.14	Up
comp36385_c0_seq1	10.86	8.45	0.18	0.19	Up
comp36401_c0_seq1	18.59	19.91	0.12	0.16	Up
comp36439_c0_seq1	120.98	94.8	13.05	12.25	Up
comp36442_c0_seq1	134.85	123.67	10.97	12.67	Up
comp36449_c0_seq1	18.99	21.98	0.08	0.07	Up
comp36457_c0_seq1	11.78	13.31	0.13	0.1	Up
comp36461_c0_seq1	61.58	83.86	0.17	0.13	Up
comp36462_c0_seq1	14.38	18.9	0.31	0.28	Up
comp36469_c0_seq1	26.66	25.59	0.34	0.31	Up
comp36481_c0_seq1	30.14	30.93	0.18	0.32	Up
comp36488_c0_seq1	55.54	62.38	0.41	0.37	Up
comp36500_c0_seq1	21.82	20.13	0.21	0.15	Up
comp36505_c0_seq1	17.25	18.13	0.13	0.09	Up
comp36508_c0_seq1	38.84	33.94	0.43	0.23	Up
comp36544_c0_seq1	95.85	77.64	9.16	16.92	Up
comp36546_c0_seq1	0.61	0.57	113.31	123.19	Down
comp36552_c0_seq1	21.53	18.31	0.28	0.25	Up
comp36585_c0_seq1	24.01	24.8	0.12	0.14	Up
comp36613_c0_seq1	35.46	45.83	0.53	0.34	Up
comp36672_c0_seq1	15.66	17.02	0.18	0.13	Up
comp36760_c0_seq1	11.28	12.56	0.1	0.13	Up
comp36814_c0_seq1	26.23	23.31	0.09	0.11	Up
comp36819_c0_seq1	50.01	41.25	0.61	0.06	Up
comp36823_c0_seq1	46.11	48.26	0.71	0.32	Up
comp36837_c0_seq1	50.27	40.52	0.08	0.15	Up
comp36874_c0_seq1	33.19	35.01	0.15	0.13	Up
comp36981_c0_seq1	21.24	19.19	0.26	0.24	Up
comp36991_c0_seq1	93.68	69.66	0.16	0.15	Up
comp36995_c0_seq1	15.68	21.61	0.23	0.21	Up
comp37110_c0_seq1	26.33	16.98	0.29	0.06	Up
comp37111_c0_seq1	18.25	16.53	0.29	0.1	Up
comp37121_c0_seq1	20.02	19.86	0.16	0.11	Up
comp37127_c0_seq1	20.58	20.94	0.29	0.2	Up
comp37145_c0_seq1	35.72	42.61	0.51	0.54	Up
comp37159_c0_seq1	39.91	42.54	0.08	0.09	Up
comp37184_c0_seq1	22.75	22.88	0.22	0.16	Up
comp37215_c0_seq1	11.54	11.22	0.07	0.12	Up
comp37220_c0_seq1	14.72	15.07	0.16	0.17	Up
comp37232_c0_seq1	30.23	27.34	0.25	0.24	Up
comp37234_c0_seq1	36.31	38.62	0.18	0.18	Up
comp37242_c0_seq1	34.78	27.11	0.16	0.13	Up
comp37243_c0_seq1	40.16	43.21	0.24	0.17	Up
comp37249_c0_seq1	25.77	16.68	0.5	0.5	Up
comp37258_c0_seq1	44.25	38.06	0.19	0.14	Up
comp37268_c0_seq1	0.55	0.76	67.63	66.32	Down
comp37291_c0_seq1	83.71	78.76	0.61	0.6	Up
comp37296_c0_seq1	22.72	28.7	0.21	0.24	Up
comp37299_c0_seq1	7.79	7.15	0.09	0.05	Up
comp37326_c0_seq1	49.11	56.9	0.11	0.08	Up
comp37332_c0_seq1	22.58	20.67	0.28	0.11	Up
comp37361_c0_seq1	24.76	20.49	0.16	0.18	Up
comp37370_c0_seq1	22.89	29.64	0.22	0.2	Up
comp37430_c0_seq1	39.42	44.83	0.42	0.35	Up
comp37447_c0_seq1	17.01	18.35	0.1	0.07	Up
comp37463_c0_seq1	33.79	30.17	0.37	0.41	Up
comp37585_c0_seq1	83.61	42.56	0.45	0.49	Up
comp37608_c0_seq1	35.35	35.01	0.45	0.2	Up
comp37614_c0_seq1	17.09	20.03	0.13	0.11	Up
comp37617_c0_seq1	14.53	17.57	0.22	0.17	Up
comp37620_c0_seq1	1.82	1.7	105.19	80.07	Down
comp37633_c0_seq1	12.54	11.34	0.11	0.1	Up
comp37675_c0_seq1	30.41	27.27	0.16	0.14	Up
comp37690_c0_seq1	49.02	45.81	0.19	0.19	Up
comp37721_c0_seq1	57.8	50.03	0.35	0.7	Up
comp37809_c0_seq1	13.18	13.77	0.16	0.12	Up
comp37832_c0_seq1	63.18	61.98	0.22	0.22	Up
comp37855_c0_seq1	19.44	17.98	0.14	0.16	Up
comp37876_c0_seq1	22.41	22.6	0.21	0.2	Up
comp37895_c0_seq1	27.72	24.67	0.72	0.59	Up
comp37906_c0_seq1	25.59	19.77	0.12	0.1	Up
comp37930_c0_seq1	16.23	16.31	0.1	0.09	Up
comp37937_c0_seq1	19.43	24.47	0.42	0.12	Up
comp37946_c0_seq1	18.09	15.72	0.22	0.21	Up
comp37979_c0_seq1	26.28	13.54	0.19	0.2	Up
comp37984_c0_seq1	2	1.95	63.49	78.91	Down
comp38000_c0_seq1	65.33	59.87	15.96	5.2	Up
comp38028_c0_seq1	14.75	22.64	0.32	0.29	Up
comp38038_c0_seq1	12.55	15.2	0.1	0.1	Up
comp38095_c0_seq1	10.95	11.5	0.1	0.1	Up
comp38116_c0_seq1	21.18	19.15	0.15	0.15	Up
comp38170_c0_seq1	19.97	24.28	0.2	0.2	Up
comp38204_c0_seq1	25.89	24.75	0.32	0.18	Up
comp38243_c0_seq1	16.89	0.23	0.1	0.08	Up
comp38257_c0_seq1	16.67	22.73	0.12	0.2	Up
comp38273_c0_seq1	30.59	26.27	0.13	0.12	Up
comp38296_c0_seq1	26.41	24.66	0.78	0.76	Up
comp38369_c0_seq1	50.94	34.58	0.19	0.26	Up
comp38382_c0_seq1	15.43	16.6	0.14	0.15	Up
comp38418_c0_seq1	14.13	14.76	0.17	0.12	Up
comp38488_c0_seq1	16.7	17.84	0.16	0.1	Up
comp38514_c0_seq1	18.68	18.32	0.17	0.13	Up
comp38534_c0_seq1	35.77	31.37	0.34	0.32	Up
comp38587_c0_seq1	31.58	47.14	0.4	0.33	Up
comp38613_c0_seq1	22.99	17.84	0.47	0.08	Up
comp38694_c0_seq1	22.87	21.26	0.21	0.18	Up
comp38745_c0_seq1	22.09	21.18	0.25	0.27	Up
comp38746_c0_seq1	29.76	27.73	0.2	0.16	Up
comp3879_c0_seq2	52.79	40.89	0.64	0.68	Up
comp38836_c0_seq1	16.75	15.97	0.28	0.19	Up
comp38920_c0_seq1	26.39	19.53	0.52	0.49	Up
comp38989_c0_seq1	45.11	33.76	0.1	0.16	Up
comp39428_c0_seq1	14.27	28.2	0.15	0.18	Up
comp40126_c0_seq1	36.12	32.45	0.49	0.49	Up
comp40319_c0_seq1	18.31	18.28	0.42	0.29	Up
comp40916_c0_seq1	10.09	10.09	0.12	0.13	Up
comp4446_c0_seq1	0.35	0.3	34.23	36.18	Down
comp4773_c0_seq1	37.77	37.93	0.15	0.12	Up
comp5313_c0_seq2	30.71	33.19	0.37	0.23	Up
comp5884_c0_seq1	19.29	20.24	0.23	0.25	Up
comp5952_c0_seq1	20.55	23.96	0.3	0.37	Up
comp6501_c0_seq1	7.11	6.37	0.06	0.06	Up
comp6809_c0_seq2	26.9	33.41	0.75	0.76	Up
comp6831_c0_seq1	33.32	30.17	0.22	0.18	Up
comp7014_c0_seq2	21.92	20.13	0.27	0.17	Up
comp7033_c0_seq1	26.32	37.46	0.25	0.3	Up
comp7081_c0_seq1	24.23	24.36	0.33	0.19	Up
comp7326_c0_seq1	36.38	22.53	0.61	0.61	Up
comp7441_c0_seq2	39.24	37.1	0.26	0.27	Up
comp7470_c0_seq1	16.29	13.23	0.1	0.08	Up
comp7518_c0_seq1	95.06	105.54	0.66	0.52	Up
comp7552_c0_seq2	29.42	39.57	0.07	0.11	Up
comp7806_c0_seq1	36.9	37.32	0.27	0.25	Up
comp7848_c0_seq1	67.12	86.79	1.14	1.06	Up
comp7907_c0_seq1	167.92	141.61	0.21	0.25	Up
comp7973_c0_seq1	357.87	334.53	0.25	0.25	Up
comp7979_c0_seq1	53.76	76.83	0.36	0.35	Up
comp7990_c0_seq1	23.79	26.69	0.28	0.23	Up
comp8029_c0_seq1	7.51	5.76	210.79	208.9	Down
comp8064_c0_seq1	25.36	19.71	0.2	0.15	Up
comp8082_c0_seq1	27.36	29.65	0.23	0.29	Up
comp8094_c0_seq1	14.19	15.04	0.18	0.15	Up
comp8125_c0_seq1	27.74	26.65	0.19	0.21	Up
comp8206_c0_seq1	44.53	71.77	1.14	0.45	Up
comp8371_c0_seq2	15.85	16.27	0.09	0.11	Up
comp8460_c0_seq1	125.57	189.47	0.57	0.63	Up
comp8506_c0_seq1	52.65	48.13	0.57	0.09	Up
comp8508_c0_seq1	57.74	59.4	0.22	0.19	Up
comp8576_c1_seq1	54.84	49.99	0.22	0.26	Up
comp8631_c0_seq1	586.21	602.16	2.99	3.18	Up
comp8649_c0_seq1	274.71	283.38	3.67	2.88	Up
comp8741_c0_seq1	35.47	26.62	0.19	0.21	Up
comp8827_c0_seq3	152.95	144.91	1.42	1.18	Up
comp8850_c0_seq1	142.75	135.68	0.51	0.33	Up
comp8853_c0_seq2	864.25	643.05	2.98	3.06	Up
comp8860_c0_seq1	7.45	7.04	2.38	2.43	Up
comp8869_c0_seq1	21.07	22.85	0.21	0.26	Up
comp8885_c0_seq1	29.7	36.87	0.52	0.46	Up
comp8945_c0_seq1	27.65	28.4	0.46	0.27	Up
comp8995_c0_seq1	280.44	281.92	6.98	7.58	Up
comp9019_c0_seq1	1052.3	1140.87	4.08	3.96	Up
comp9028_c0_seq1	604.2	538.62	2.57	2.81	Up
comp9040_c0_seq1	1005.77	852.07	2.59	2.47	Up
comp9049_c0_seq1	864.22	718.92	3	2.39	Up
comp9106_c0_seq1	106.15	96.07	0.83	0.85	Up
comp9134_c0_seq1	26.72	30.79	0.25	0.29	Up
comp9251_c0_seq1	23.71	18.87	0.14	0.15	Up
comp9317_c0_seq1	107.28	121.83	1.38	1.27	Up
comp9320_c0_seq2	800.22	856.18	0.1	0.1	Up
comp9351_c0_seq1	51.73	52.83	0.1	0.1	Up
comp9393_c0_seq1	122.24	128.82	1.52	1.13	Up
comp9429_c0_seq1	56.97	61.81	1121.12	1080.12	Down
comp947_c0_seq1	29.84	29.67	0.23	0.14	Up
comp9553_c0_seq1	18.65	25.5	0.2	0.25	Up
comp9564_c0_seq1	41.18	37.96	0.62	0.84	Up
comp9662_c0_seq2	112.42	95.36	0.55	0.48	Up
comp9680_c0_seq2	55.19	57.47	0.69	0.81	Up
comp9842_c0_seq2	28.29	26.27	0.29	0.21	Up
